# Supplementary material for: Epigenetic activation of FOXF1 confers cancer stem cell properties to cisplatin-resistant non-small cell lung cancer
Source: PubMed Central journal article supplement — Int J Oncol. 2020 Mar 4;56(5):1083–92. doi: 10.3892/ijo.2020.5003 (PMC7115358; doi:10.3892/ijo.2020.5003), 2020-03-04
Supplement: Supplementary_Data.pdf [file Supplementary_Data.pdf]

Figure S1. DNA methylation analysis of the FOXF1 gene upstream regulatory region. Pyrosequencing analysis indicates that the DNA methylation levels of FOXF1 were decreased in A549/DDP cells compared with A549, H1299 and 16HBE cells at 12 CpG sites. FOXF1, forkhead box F1.

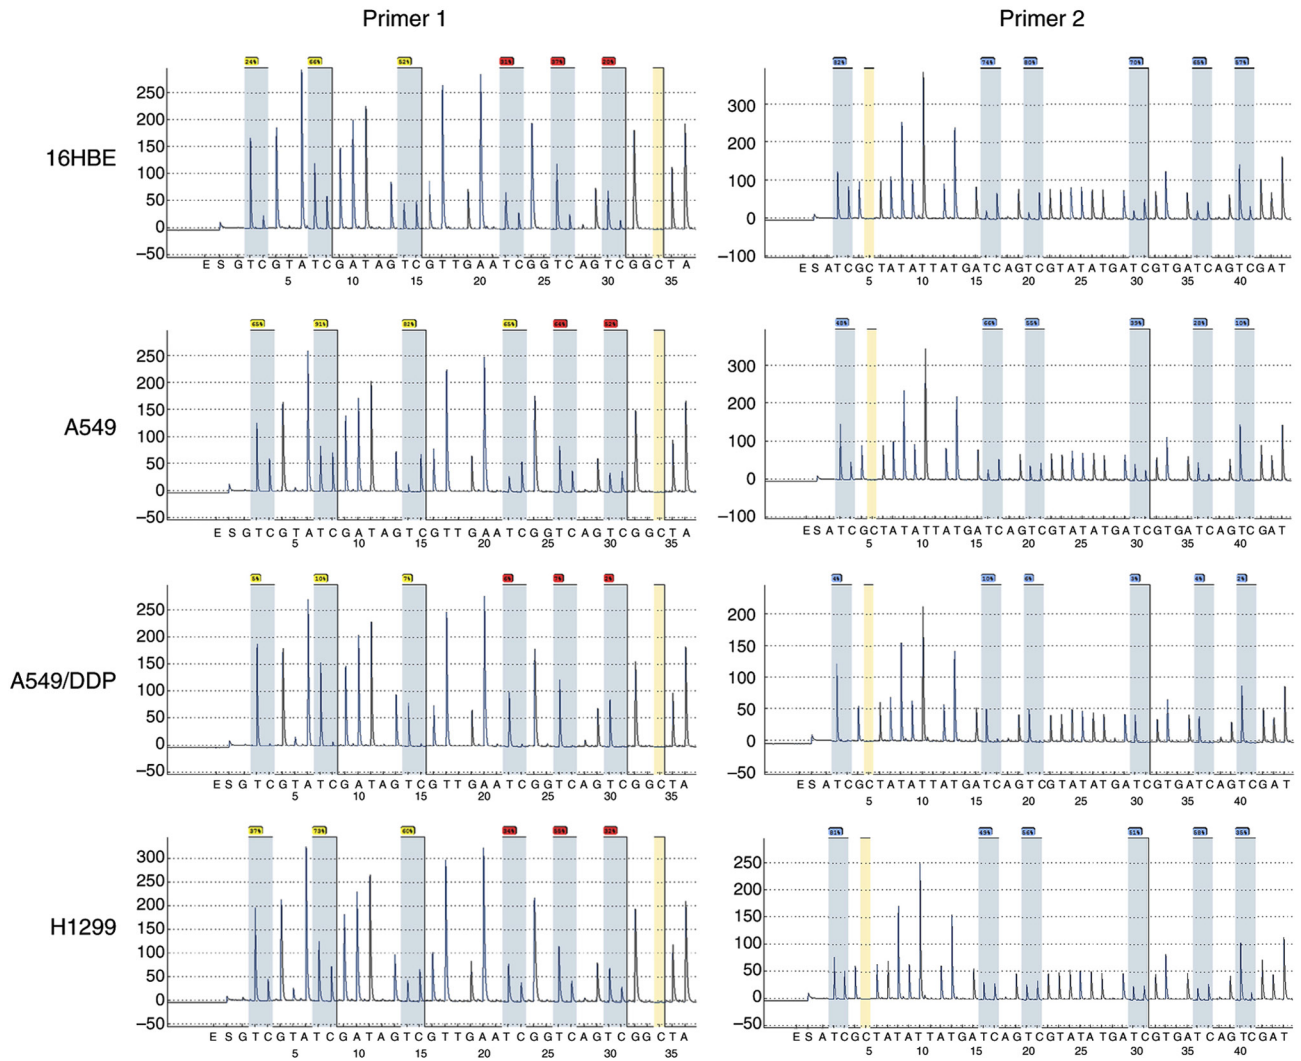

Figure S2. FOXF1 regulates cisplatin resistance by inhibiting cell apoptosis. Overexpression of FOXF1 decreased cisplatin-induced cell apoptosis in 16HBE cells (DDP treatment). The late apoptotic cells were shown in the bar graph. (n=3); \*P<0.05 (FOXF1 plasmids compared to control plasmids). FOXF1, forkhead box F1.

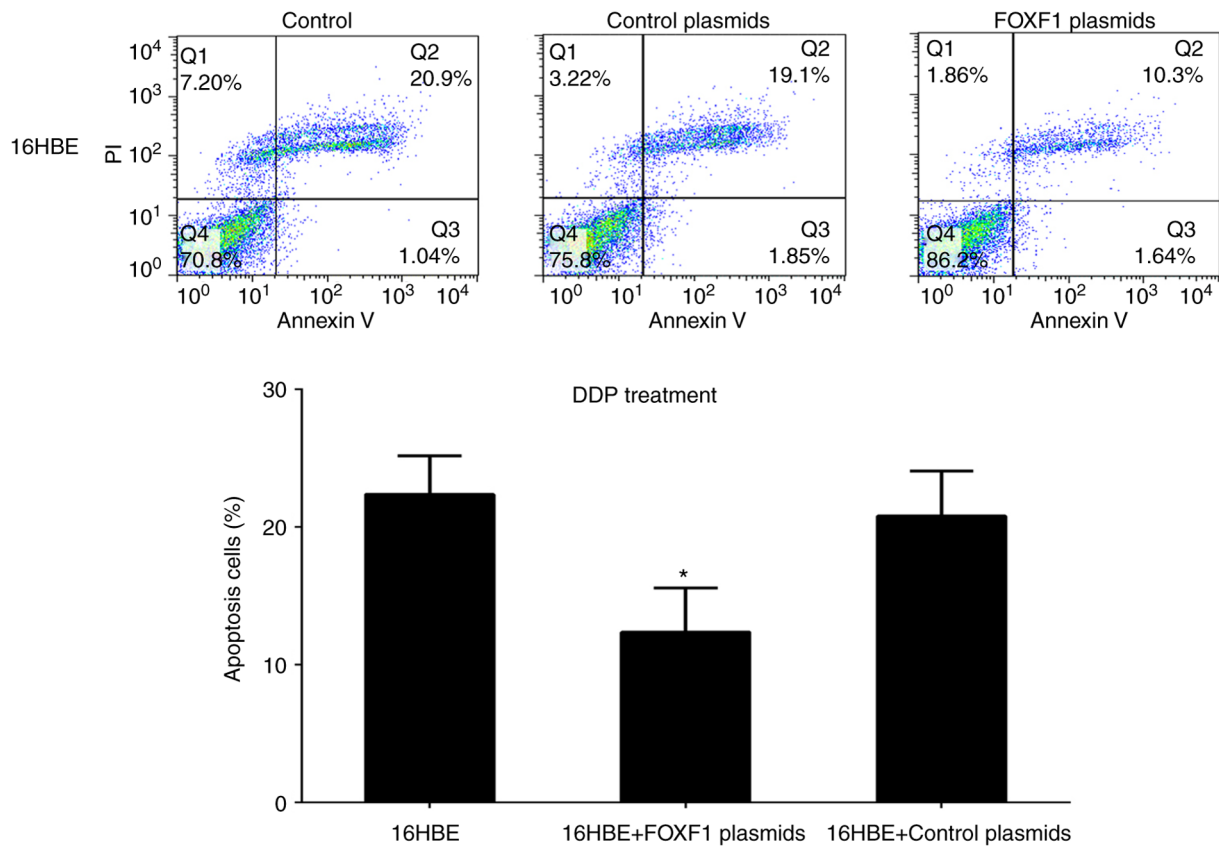

Figure S3. FOXF1 promotes the expressions of stem cell markers. Immunofluorescence detection of ALDH1 and OCT4 in 16HBE cells after transfection of FOXF1 plasmids. (n=3); \*P<0.05 (FOXF1 plasmids compared to control plasmids). FOXF1, forkhead box F1.

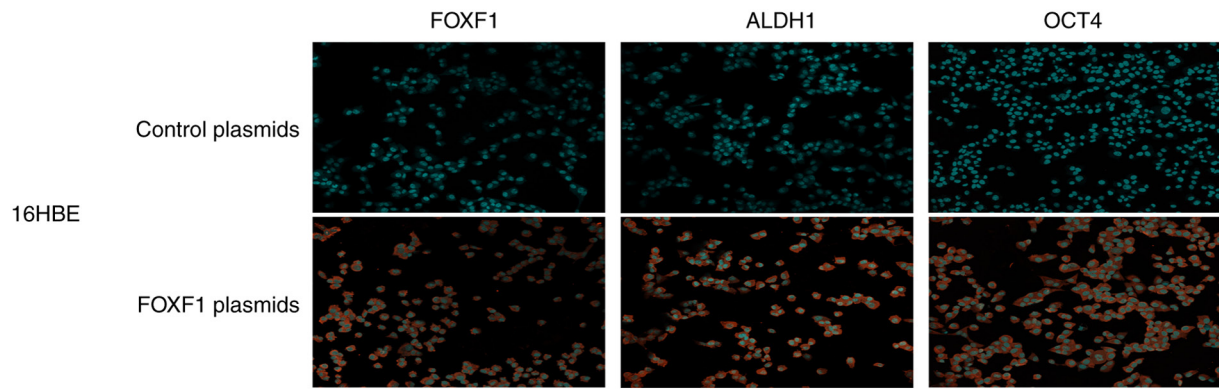

Table SI. Overall patient characteristics.

| Clinicopathological factors | No. of patients |
|-----------------------------|-----------------|
| Total (n)                   | 70              |
| Sex, n (%)                  |                 |
| Male                        | 53 (75.7%)      |
| Female                      | 17 (24.3%)      |
| Age, years (range)          |                 |
| Mean                        | 57.2 (26-77)    |
| Histological type, n (%)    |                 |
| Adenocarcinoma              | 39 (55.7%)      |
| Squamous carcinoma          | 31 (44.3%)      |
| TNM clinical stage, n (%)   |                 |
| III                         | 43 (61.4%)      |
| IV                          | 27 (38.6%)      |

Table SII. Sequences of RT-PCR primers and pyrosequencing primers.

| Primer                | Sequence                           |
|-----------------------|------------------------------------|
| FOXF1 F               | 5'-TACATCGCGCTCATCGTCAT-3'         |
| FOXF1 R               | 5'-GTTTCATCATGCTGTACATGGGC-3'      |
| ALDH1 F               | 5'-CAAGATCCAGGGCCGTACAA-3'         |
| ALDH1 R               | 5'-CAGTGCAGGCCCTATCTTCC-3'         |
| OCT4 F                | 5'-GCTGGATGTCAGGGCTCTTT-3'         |
| OCT4 R                | 5'-AACCACACTCGGACCACATC-3'         |
| GAPDH F               | 5'-TGACTTCAACAGCGACACCCA-3'        |
| GAPDH R               | 5'-CACCTGTTGCTGTAGCCAAA-3'         |
| Position 1 forward    | 5'-GTAAATTTTTTGTAGGGTTTTTGTATTT-3' |
| Position 1 reverse    | 5'-ACCCCCAACACACACTAA-3'           |
| Position 1 sequencing | 5'-TGTTAGGGTTTTTGTATTTT-3'         |
| Position 2 forward    | 5'-GGAAGTTTAAGGTTTATAGGAGTTT-3'    |
| Position 2 reverse    | 5'-CTACCAAACCTTTACCATCTC-3'        |
| Position 2 sequencing | 5'-AGGTTTATAGGAGTTTAAGT-3'         |

Table SIII. Different methylation of FOXF1 between A549/DDP cells and A549 cells.

| Gene region      | Average of $\beta$ -values |       | Fold change (A549/DDP/A549) | P-value      |
|------------------|----------------------------|-------|-----------------------------|--------------|
|                  | A549/DDP                   | A549  |                             |              |
| TSS1500 region 1 | 0.137                      | 0.502 | <b>0.273</b>                | <b>0.001</b> |
| TSS1500 region 2 | 0.094                      | 0.087 | 1.073                       | 0.381        |
| 1stExon          | 0.608                      | 0.942 | 0.646                       | 0.019        |
| Gene body        | 0.774                      | 0.929 | 0.833                       | 0.086        |
| 3'UTR            | 0.667                      | 0.906 | 0.736                       | 0.025        |

Values in bold font indicate statistically significant differences ( $P < 0.05$ ).

Table SIV. Pyrosequencing analysis of the methylation status of FOXF1 in normal lung cells (16HBE cells) and NSCLC cells (A549, A549/DDP and H1299 cells).

|   | Cells    | Methylation percentages of position (%) |    |    |    |    |    |    |    |    |    |    |    |
|---|----------|-----------------------------------------|----|----|----|----|----|----|----|----|----|----|----|
|   |          | 1                                       | 2  | 3  | 4  | 5  | 6  | 7  | 8  | 9  | 10 | 11 | 12 |
| 1 | 16HBE    | 24                                      | 66 | 52 | 31 | 37 | 20 | 82 | 74 | 80 | 70 | 65 | 57 |
| 2 | A549     | 65                                      | 91 | 82 | 65 | 64 | 52 | 48 | 66 | 55 | 39 | 28 | 10 |
| 3 | A549/DDP | 5                                       | 10 | 7  | 6  | 7  | 2  | 4  | 10 | 6  | 3  | 4  | 2  |
| 4 | H1299    | 37                                      | 73 | 60 | 34 | 55 | 32 | 81 | 49 | 56 | 51 | 58 | 35 |
